# Supplementary material for: The Sensitization Profile for Selected Food Allergens in Polish Children Assessed with the Use of a Precision Allergy Molecular Diagnostic Technique
Source: MDPI journal article supplement (doi:10.3390/ijms25020825), 2024-01-09
Supplement: s1 [file s1]

**Table A2: The entire ranking of sIgE rates in response to all analyzed food allergen molecules**

| Place in the ranking of sIgE frequency of investigated 80 food allergen molecules | Molecule      | Protein family  | Allergen source                          | Number of all sIgE determinations performed | Number and % of „+” sIgE from all sIgE determinations performed |        | Place in the ranking of sIgE frequency of investigated 77 food allergen molecules | Mean concentration [kU/ l] |
|-----------------------------------------------------------------------------------|---------------|-----------------|------------------------------------------|---------------------------------------------|-----------------------------------------------------------------|--------|-----------------------------------------------------------------------------------|----------------------------|
| 1                                                                                 | rCor a 1.0401 | PR-10           | Hazel ( <i>Corylus avellana</i> )        | 3715                                        | 883                                                             | 23,77% | 6                                                                                 | 12,22                      |
| 2                                                                                 | rMal d 1      | PR-10           | Apple ( <i>Malus domestica</i> )         | 3715                                        | 831                                                             | 22,37% | 12                                                                                | 10,89                      |
| 3                                                                                 | rAra h 8      | PR-10           | Peanut ( <i>Arachis hypogaea</i> )       | 3715                                        | 629                                                             | 16,93% | 27                                                                                | 7,99                       |
| 4                                                                                 | nAra h 1      | 7/8S Globulin   | Peanut ( <i>Arachis hypogaea</i> )       | 3715                                        | 579                                                             | 15,59% | 20                                                                                | 9,35                       |
| 5                                                                                 | rGly m 4      | PR-10           | Soy ( <i>Glycine max</i> )               | 3715                                        | 564                                                             | 15,18% | 15                                                                                | 9,91                       |
| 6                                                                                 | rApi g 1      | PR-10           | Celery ( <i>Apium graveolens</i> )       | 3715                                        | 560                                                             | 15,07% | 21                                                                                | 9,08                       |
| 7                                                                                 | rDau c 1      | PR-10           | Carrot ( <i>Daucus carota</i> )          | 3715                                        | 511                                                             | 13,76% | 22                                                                                | 8,64                       |
| 8                                                                                 | nJug r 4      | 11S Globulin    | Walnut ( <i>Juglans regia</i> )          | 3143                                        | 431                                                             | 13,71% | 52                                                                                | 4,05                       |
| 9                                                                                 | nCor a 9      | 11S Globulin    | Hazel ( <i>Corylus avellana</i> )        | 3715                                        | 486                                                             | 13,08% | 50                                                                                | 4,49                       |
| 10                                                                                | nGal d 2      | Ovalbumin       | Egg white ( <i>Gallus domesticus</i> )   | 3715                                        | 483                                                             | 13,00% | 47                                                                                | 4,80                       |
| 11                                                                                | nSes i 1      | 2S Albumin      | Sesame ( <i>Sesamum indicum</i> )        | 3715                                        | 453                                                             | 12,19% | 19                                                                                | 9,39                       |
| 12                                                                                | rAra h 2      | 2S Albumin      | Peanut ( <i>Arachis hypogaea</i> )       | 3715                                        | 449                                                             | 12,09% | 1                                                                                 | 15,92                      |
| 13                                                                                | nGal d 4      | Lysozyme C      | Egg white ( <i>Gallus domesticus</i> )   | 3715                                        | 425                                                             | 11,44% | 38                                                                                | 5,32                       |
| 14                                                                                | nGal d 1      | Ovomucoid       | Egg white ( <i>Gallus domesticus</i> )   | 3715                                        | 422                                                             | 11,36% | 33                                                                                | 6,36                       |
| 15                                                                                | nAra h 3      | 11S Globulin    | Peanut ( <i>Arachis hypogaea</i> )       | 3715                                        | 410                                                             | 11,04% | 31                                                                                | 6,44                       |
| 16                                                                                | nJug r 2      | 7/8S Globulin   | Walnut ( <i>Juglans regia</i> )          | 3715                                        | 401                                                             | 10,79% | 36                                                                                | 5,85                       |
| 17                                                                                | nBos d 8      | Casein          | Cow's milk ( <i>Bos domesticus</i> )     | 3715                                        | 389                                                             | 10,47% | 25                                                                                | 8,24                       |
| 18                                                                                | nAra h 6      | 2S Albumin      | Peanut ( <i>Arachis hypogaea</i> )       | 3715                                        | 363                                                             | 9,77%  | 2                                                                                 | 14,43                      |
| 19                                                                                | nJug r 1      | 2S Albumin      | Walnut ( <i>Juglans regia</i> )          | 3715                                        | 354                                                             | 9,53%  | 3                                                                                 | 14,19                      |
| 20                                                                                | nGly m 6      | 11S Globulin    | Soy ( <i>Glycine max</i> )               | 3715                                        | 341                                                             | 9,18%  | 48                                                                                | 4,63                       |
| 21                                                                                | rAna o 3      | 2S Albumin      | Cashew ( <i>Anacardium occidentale</i> ) | 3715                                        | 324                                                             | 8,72%  | 8                                                                                 | 11,93                      |
| 22                                                                                | nGal d 3      | Ovotransferrin  | Egg white ( <i>Gallus domesticus</i> )   | 3715                                        | 321                                                             | 8,64%  | 46                                                                                | 4,81                       |
| 23                                                                                | nCor a 14     | 2S Albumin      | Hazel ( <i>Corylus avellana</i> )        | 3715                                        | 316                                                             | 8,51%  | 16                                                                                | 9,85                       |
| 24                                                                                | nBos d 5      | β-Lactoglobulin | Cow's milk ( <i>Bos domesticus</i> )     | 3715                                        | 296                                                             | 7,97%  | 35                                                                                | 6,22                       |

|    |                |                          |                                              |      |     |       |    |       |
|----|----------------|--------------------------|----------------------------------------------|------|-----|-------|----|-------|
| 25 | nBos d 4       | $\alpha$ -Lactalbumin    | Cow's milk ( <i>Bos domesticus</i> )         | 3715 | 286 | 7,70% | 32 | 6,37  |
| 26 | nJug r 6       | 7/8S Globulin            | Walnut ( <i>Juglans regia</i> )              | 3143 | 229 | 7,29% | 42 | 5,08  |
| 27 | rPis v 1       | 2S Albumin               | Pistachio ( <i>Pistacia vera</i> )           | 3143 | 228 | 7,25% | 9  | 11,50 |
| 28 | rPru p 3       | nsLTP                    | Peach ( <i>Prunus persica</i> )              | 3715 | 241 | 6,49% | 55 | 3,72  |
| 29 | rCuc m 2       | Profilin                 | Muskmelon ( <i>Cucumis melo</i> )            | 3143 | 195 | 6,20% | 4  | 12,92 |
| 30 | nAct d 1       | Cysteine Protease        | Kiwi ( <i>Actinidia deliciosa</i> )          | 3715 | 217 | 5,84% | 34 | 6,28  |
| 31 | rSus d 1       | Serum Albumin            | Pig ( <i>Sus domesticus</i> )                | 3143 | 170 | 5,41% | 28 | 7,95  |
| 32 | rMal d 3       | nsLTP                    | Apple ( <i>Malus domestica</i> )             | 3715 | 187 | 5,03% | 59 | 3,22  |
| 33 | nSin a 1       | 2S Albumin               | Mustard ( <i>Brassica / Sinapis spp.</i> )   | 3715 | 184 | 4,95% | 44 | 5,00  |
| 34 | rZea m 14      | nsLTP                    | Corn, cereal ( <i>Zea mays</i> )             | 3143 | 154 | 4,90% | 58 | 3,26  |
| 35 | nPis v 2       | 11S Globulin             | Pistachio ( <i>Pistacia vera</i> )           | 3143 | 148 | 4,71% | 57 | 3,41  |
| 36 | nPis v 3       | 7S wicilina              | Pistachio ( <i>Pistacia vera</i> )           | 3143 | 147 | 4,68% | 50 | 4,49  |
| 37 | rSco s 1       | $\beta$ -Parvalbumin     | Atlantic mackerel ( <i>Scomber scombru</i> ) | 3143 | 146 | 4,65% | 11 | 11,19 |
| 38 | rCyp c 1       | $\beta$ -Parvalbumin     | Carp ( <i>Cyprinus carpio</i> )              | 3715 | 169 | 4,55% | 13 | 10,10 |
| 39 | rAra h 9       | nsLTP                    | Peanut ( <i>Arachis hypogaea</i> )           | 3715 | 167 | 4,50% | 54 | 3,84  |
| 40 | nTri a aA_Tl   | na-Amylase Trypsin-Inhib | Wheat ( <i>Triticum aestivum</i> )           | 3143 | 140 | 4,45% | 37 | 5,78  |
| 41 | rClu h 1       | $\beta$ -Parvalbumin     | Atlantic herring ( <i>Clupea harengus</i> )  | 3143 | 136 | 4,33% | 7  | 12,07 |
| 41 | rSal s 1       | $\beta$ -Parvalbumin     | Salmon ( <i>Salmo salar</i> )                | 3143 | 136 | 4,33% | 10 | 11,44 |
| 42 | rThu a 1       | $\beta$ -Parvalbumin     | Tuna ( <i>Thunnus albacares</i> )            | 3143 | 134 | 4,26% | 5  | 12,26 |
| 44 | nAct d 10      | nsLTP                    | Kiwi ( <i>Actinidia deliciosa</i> )          | 3715 | 151 | 4,06% | 61 | 3,07  |
| 44 | nBos d 6       | Serum Albumin            | Beef ( <i>Bos domesticus</i> )               | 3715 | 151 | 4,06% | 40 | 5,28  |
| 45 | nGad m 1       | $\beta$ -Parvalbumin     | Atlantic cod ( <i>Gadus morhua</i> )         | 3715 | 150 | 4,04% | 23 | 8,31  |
| 46 | rXip g 1       | $\beta$ -Parvalbumin     | Swordfish ( <i>Xiphias gladius</i> )         | 3143 | 118 | 3,75% | 17 | 9,84  |
| 47 | rCor a 8       | nsLTP                    | Hazel ( <i>Corylus avellana</i> )            | 3715 | 119 | 3,20% | 63 | 2,55  |
| 48 | nGal d 5       | Serum Albumin            | Egg yolk ( <i>Gallus domesticus</i> )        | 3715 | 118 | 3,18% | 61 | 3,07  |
| 49 | nVit v 1       | nsLTP                    | Grape ( <i>Vitis vinifera</i> )              | 3715 | 117 | 3,15% | 59 | 3,22  |
| 50 | rTri a 14      | nsLTP                    | Wheat ( <i>Triticum aestivum</i> )           | 3143 | 94  | 2,99% | 30 | 6,52  |
| 51 | nPap s 2S      | 2S Albumin               | Poppy seed ( <i>Papaver somniferum</i> )     | 3715 | 108 | 2,91% | 49 | 4,59  |
| 52 | nMac i 2S      | 2S Albumin               | Macadamia ( <i>Macadamia integrifolia</i> )  | 3715 | 97  | 2,61% | 43 | 5,02  |
| 53 | rApi g 2       | nsLTP                    | Celery ( <i>Apium graveolens</i> )           | 3715 | 95  | 2,56% | 69 | 1,93  |
| 54 | rAna o 2       | 11S Globulin             | Cashew ( <i>Anacardium occidentale</i> )     | 3143 | 77  | 2,45% | 64 | 2,51  |
| 55 | nTri a Gliadin | Gliadin                  | Wheat ( <i>Triticum aestivum</i> )           | 500  | 12  | 2,40% | 39 | 5,31  |
| 56 | rTri a 19      | Omega-5-Gliadin          | Wheat ( <i>Triticum aestivum</i> )           | 3143 | 74  | 2,35% | 53 | 4,02  |
| 57 | rJug r 3       | nsLTP                    | Walnut ( <i>Juglans regia</i> )              | 3143 | 70  | 2,23% | 65 | 2,42  |
| 58 | rGly m 5       | 7/8S Globulin            | Soy ( <i>Glycine max</i> )                   | 3715 | 77  | 2,07% | 70 | 1,92  |
| 59 | nAct d 2       | TLP                      | Kiwi ( <i>Actinidia deliciosa</i> )          | 3715 | 76  | 2,05% | 68 | 2,10  |

|    |           |                           |                                              |      |    |       |    |      |
|----|-----------|---------------------------|----------------------------------------------|------|----|-------|----|------|
| 59 | rAni s 3  | Tropomyosin               | Anisakis simplex ( <i>Anisakis simplex</i> ) | 3715 | 76 | 2,05% | 26 | 8,08 |
| 60 | nPen m 1  | Tropomyosin               | Jack tiger shrimp ( <i>Penaeus monodon</i> ) | 3715 | 69 | 1,86% | 14 | 9,98 |
| 61 | rApi g 6  | nsLTP                     | Celery ( <i>Apium graveolens</i> )           | 3715 | 66 | 1,78% | 56 | 3,42 |
| 63 | rPen m 2  | Arginine Kinase           | Jack tiger shrimp ( <i>Penaeus monodon</i> ) | 3143 | 49 | 1,56% | 24 | 8,27 |
| 64 | nAct d 5  | Kiwellin                  | Kiwi ( <i>Actinidia deliciosa</i> )          | 3715 | 57 | 1,53% | 62 | 2,73 |
| 65 | nSola l 6 | nsLTP                     | Tomato ( <i>Solanum lycopersicum</i> )       | 3715 | 52 | 1,40% | 51 | 4,28 |
| 66 | nGly m 8  | 2S Albumin                | Soy ( <i>Glycine max</i> )                   | 3715 | 43 | 1,16% | 66 | 2,39 |
| 67 | nBer e 1  | 2S Albumin                | Brazil nut ( <i>Bertholletia excelsa</i> )   | 3715 | 37 | 1,00% | 41 | 5,27 |
| 68 | nFag e 2  | 2S Albumin                | Buckwheat ( <i>Fagopyrum esculentum</i> )    | 3715 | 36 | 0,97% | 67 | 2,28 |
| 69 | rPen m 3  | Myosin light chain        | Jack tiger shrimp ( <i>Penaeus monodon</i> ) | 3143 | 22 | 0,70% | 60 | 3,16 |
| 69 | rPen m 4  | Plasma Calcium Binding    | Jack tiger shrimp ( <i>Penaeus monodon</i> ) | 3143 | 22 | 0,70% | 29 | 7,78 |
| 70 | rRaj c    | $\alpha$ -Parvalbumin     | Thornback ray ( <i>Thornback ray</i> )       | 3143 | 20 | 0,64% | 45 | 4,84 |
| 71 | rCra c 6  | Troponin C                | Brown shrimp ( <i>Crangon crangon</i> )      | 3143 | 18 | 0,57% | 18 | 9,65 |
| 72 | rAra h 15 | Oleolin                   | Peanut ( <i>Arachis hypogaea</i> )           | 3143 | 14 | 0,45% | 72 | 1,00 |
| 73 | rChe a 1  | Ole e 1-Family            | Lamb's quarter ( <i>Chenopodium album</i> )  | 3715 | 16 | 0,43% | 71 | 1,66 |
| 74 | rAni s 1  | Hit Serine Protease Inhib | Anisakis simplex ( <i>Anisakis simplex</i> ) | 3715 | 11 | 0,30% | 74 | 0,78 |
| 75 | nMal d 2  | TLP                       | Apple ( <i>Malus domestica</i> )             | 3715 | 10 | 0,27% | 73 | 0,99 |
