# Supplementary material for: The Sensitization Profile for Selected Food Allergens in Polish Children Assessed with the Use of a Precision Allergy Molecular Diagnostic Technique
Source: MDPI journal article supplement (doi:10.3390/ijms25020825), 2024-01-09
Supplement: s1 [file s1]

**Table A3: sIgE against “the Big 8” food allergen molecules stratified by age**

|                   |           | Age             |         |               |         | Chi-square test |                    |      |         |      |         |          |         |      |         |     |         |          |         |
|-------------------|-----------|-----------------|---------|---------------|---------|-----------------|--------------------|------|---------|------|---------|----------|---------|------|---------|-----|---------|----------|---------|
|                   |           | Up to 12 months |         | 1-5 years old |         |                 |                    |      |         |      |         |          |         |      |         |     |         |          |         |
|                   |           | N               | %       | N             | %       | $\chi^2$        | p                  | N    | %       | N    | %       | $\chi^2$ | p       | N    | %       | N   | %       | $\chi^2$ | p       |
| Bos domesticus    |           |                 |         |               |         |                 |                    |      |         |      |         |          |         |      |         |     |         |          |         |
| nBos d 4          | Positive  | 34              | 25,20%  | 152           | 10,30%  | 27              | <0,001*            | 152  | 10,30%  | 94   | 5,50%   | 27       | <0,001* | 94   | 5,50%   | 6   | 1,50%   | 10,9     | 0,001*  |
|                   | Total     | 135             | 100,00% | 1469          | 100,00% |                 |                    | 1469 | 100,00% | 1721 | 100,00% |          |         | 1721 | 100,00% | 390 | 100,00% |          |         |
| nBos d 5          | Positive  | 32              | 23,70%  | 157           | 10,70%  | 20              | <0,001*            | 157  | 10,70%  | 100  | 5,80%   | 25       | <0,001* | 100  | 5,80%   | 7   | 1,80%   | 10,7     | 0,001*  |
|                   | Total     | 135             | 100,00% | 1469          | 100,00% |                 |                    | 1469 | 100,00% | 1721 | 100,00% |          |         | 1721 | 100,00% | 390 | 100,00% |          |         |
| nBos d 6          | Pozytywne | 11              | 8,10%   | 64            | 4,40%   | 4               | 0,046*             | 64   | 4,40%   | 66   | 3,80%   | 0,6      | 0,458   | 66   | 3,80%   | 10  | 2,60%   | 1,48     | 0,224   |
|                   | Total     | 135             | 100,00% | 1469          | 100,00% |                 |                    | 1469 | 100,00% | 1721 | 100,00% |          |         | 1721 | 100,00% | 390 | 100,00% |          |         |
| nBos d 8          | Positive  | 41              | 30,40%  | 202           | 13,80%  | 27              | <0,001*            | 202  | 13,80%  | 133  | 7,70%   | 31       | <0,001* | 133  | 7,70%   | 13  | 3,30%   | 9,54     | 0,002*  |
|                   | Total     | 135             | 100,00% | 1469          | 100,00% |                 |                    | 1469 | 100,00% | 1721 | 100,00% |          |         | 1721 | 100,00% | 390 | 100,00% |          |         |
| Gallus domesticus |           |                 |         |               |         |                 |                    |      |         |      |         |          |         |      |         |     |         |          |         |
| nGal d 1          | Positive  | 37              | 27,40%  | 216           | 14,70%  | 15              | <0,001*            | 216  | 14,70%  | 150  | 8,70%   | 28       | <0,001* | 150  | 8,70%   | 19  | 4,90%   | 6,38     | 0,012*  |
|                   | Total     | 135             | 100,00% | 1469          | 100,00% |                 |                    | 1469 | 100,00% | 1721 | 100,00% |          |         | 1721 | 100,00% | 390 | 100,00% |          |         |
| nGal d 2          | Positive  | 50              | 37,00%  | 250           | 17,00%  | 33              | <0,001*            | 250  | 17,00%  | 165  | 9,60%   | 39       | <0,001* | 165  | 9,60%   | 18  | 4,60%   | 9,93     | 0,002*  |
|                   | Total     | 135             | 100,00% | 1469          | 100,00% |                 |                    | 1469 | 100,00% | 1721 | 100,00% |          |         | 1721 | 100,00% | 390 | 100,00% |          |         |
| nGal d 3          | Positive  | 19              | 14,10%  | 161           | 11,00%  | 1,2             | 0,273              | 161  | 11,00%  | 129  | 7,50%   | 12       | 0,001*  | 129  | 7,50%   | 12  | 3,10%   | 9,96     | 0,002*  |
|                   | Total     | 135             | 100,00% | 1469          | 100,00% |                 |                    | 1469 | 100,00% | 1721 | 100,00% |          |         | 1721 | 100,00% | 390 | 100,00% |          |         |
| nGal d 4          | Positive  | 41              | 30,40%  | 236           | 16,10%  | 18              | <0,001*            | 236  | 16,10%  | 129  | 7,50%   | 57       | <0,001* | 129  | 7,50%   | 19  | 4,90%   | 3,36     | 0,067   |
|                   | Total     | 135             | 100,00% | 1469          | 100,00% |                 |                    | 1469 | 100,00% | 1721 | 100,00% |          |         | 1721 | 100,00% | 390 | 100,00% |          |         |
| nGal d 5          | Positive  | 6               | 4,40%   | 49            | 3,30%   | 0,5             | 0,498 <sup>a</sup> | 49   | 3,30%   | 57   | 3,30%   | 0        | 0,97    | 57   | 3,30%   | 6   | 1,50%   | 3,45     | 0,063   |
|                   | Total     | 135             | 100,00% | 1469          | 100,00% |                 |                    | 1469 | 100,00% | 1721 | 100,00% |          |         | 1721 | 100,00% | 390 | 100,00% |          |         |
| Arachis hypogaea  |           |                 |         |               |         |                 |                    |      |         |      |         |          |         |      |         |     |         |          |         |
| nAra h 1          | Positive  | 36              | 26,70%  | 290           | 19,70%  | 3,7             | 0,056              | 290  | 19,70%  | 229  | 13,30%  | 24       | <0,001* | 229  | 13,30%  | 24  | 6,20%   | 15,4     | <0,001* |
|                   | Total     | 135             | 100,00% | 1469          | 100,00% |                 |                    | 1469 | 100,00% | 1721 | 100,00% |          |         | 1721 | 100,00% | 390 | 100,00% |          |         |
| rAra h 2          | Positive  | 20              | 14,80%  | 229           | 15,60%  | 0,1             | 0,812              | 229  | 15,60%  | 182  | 10,60%  | 18       | <0,001* | 182  | 10,60%  | 18  | 4,60%   | 13,2     | <0,001* |
|                   | Total     | 135             | 100,00% | 1469          | 100,00% |                 |                    | 1469 | 100,00% | 1721 | 100,00% |          |         | 1721 | 100,00% | 390 | 100,00% |          |         |
| nAra h 3          | Positive  | 19              | 14,10%  | 194           | 13,20%  | 0,1             | 0,776              | 194  | 13,20%  | 176  | 10,20%  | 6,9      | 0,009*  | 176  | 10,20%  | 21  | 5,40%   | 8,81     | 0,003*  |
|                   | Total     | 135             | 100,00% | 1469          | 100,00% |                 |                    | 1469 | 100,00% | 1721 | 100,00% |          |         | 1721 | 100,00% | 390 | 100,00% |          |         |
| nAra h 6          | Positive  | 13              | 9,60%   | 161           | 11,00%  | 0,2             | 0,634              | 161  | 11,00%  | 170  | 9,90%   | 1        | 0,318   | 170  | 9,90%   | 19  | 4,90%   | 9,78     | 0,002*  |
|                   | Total     | 135             | 100,00% | 1469          | 100,00% |                 |                    | 1469 | 100,00% | 1721 | 100,00% |          |         | 1721 | 100,00% | 390 | 100,00% |          |         |

|                   |          |     |         |      |         |     |                       |      |         |      |         |     |         |      |         |     |         |      |                    |
|-------------------|----------|-----|---------|------|---------|-----|-----------------------|------|---------|------|---------|-----|---------|------|---------|-----|---------|------|--------------------|
| rAra h 8          | Total    | 135 | 100,00% | 1469 | 100,00% | 0,2 | 0,004                 | 1469 | 100,00% | 1721 | 100,00% | 1   | 0,010   | 1721 | 100,00% | 390 | 100,00% | 0,10 | 0,002              |
|                   | Positive | 0   | 0,00%   | 114  | 7,80%   | 11  | 0,001*                | 114  | 7,80%   | 394  | 22,90%  | 136 | <0,001* | 394  | 22,90%  | 121 | 31,00%  | 11,4 | 0,001*             |
| rAra h 9          | Total    | 135 | 100,00% | 1469 | 100,00% |     |                       | 1469 | 100,00% | 1721 | 100,00% |     |         | 1721 | 100,00% | 390 | 100,00% |      |                    |
|                   | Positive | 2   | 1,50%   | 62   | 4,20%   | 2,4 | 0,12                  | 62   | 4,20%   | 89   | 5,20%   | 1,6 | 0,207   | 89   | 5,20%   | 14  | 3,60%   | 1,71 | 0,19               |
| rAra h 15         | Total    | 135 | 100,00% | 1469 | 100,00% |     |                       | 1469 | 100,00% | 1721 | 100,00% |     |         | 1721 | 100,00% | 390 | 100,00% |      |                    |
|                   | Positive | 0   | 0,00%   | 6    | 0,50%   | 0,6 | 0,435 <sup>a,b</sup>  | 6    | 0,50%   | 5    | 0,40%   | 0,1 | 0,724   | 5    | 0,40%   | 3   | 0,90%   | 1,73 | 0,188 <sup>a</sup> |
| rGly m 4          | Total    | 134 | 100,00% | 1322 | 100,00% |     |                       | 1322 | 100,00% | 1363 | 100,00% |     |         | 1363 | 100,00% | 324 | 100,00% |      |                    |
|                   | Positive | 0   | 0,00%   | 102  | 6,90%   | 10  | 0,002*                | 102  | 6,90%   | 363  | 21,10%  | 127 | <0,001* | 363  | 21,10%  | 99  | 25,40%  | 3,43 | 0,064              |
| rGly m 5          | Total    | 135 | 100,00% | 1469 | 100,00% |     |                       | 1469 | 100,00% | 1721 | 100,00% |     |         | 1721 | 100,00% | 390 | 100,00% |      |                    |
|                   | Positive | 2   | 1,50%   | 28   | 1,90%   | 0,1 | 0,727 <sup>a</sup>    | 28   | 1,90%   | 43   | 2,50%   | 1,3 | 0,258   | 43   | 2,50%   | 4   | 1,00%   | 3,17 | 0,075              |
| nGly m 6          | Total    | 135 | 100,00% | 1469 | 100,00% |     |                       | 1469 | 100,00% | 1721 | 100,00% |     |         | 1721 | 100,00% | 390 | 100,00% |      |                    |
|                   | Positive | 17  | 12,60%  | 161  | 11,00%  | 0,3 | 0,563                 | 161  | 11,00%  | 148  | 8,60%   | 5,1 | 0,025*  | 148  | 8,60%   | 15  | 3,80%   | 10,1 | 0,001*             |
| nGly m 8          | Total    | 135 | 100,00% | 1469 | 100,00% |     |                       | 1469 | 100,00% | 1721 | 100,00% |     |         | 1721 | 100,00% | 390 | 100,00% |      |                    |
|                   | Positive | 0   | 0,00%   | 14   | 1,00%   | 1,3 | 0,255 <sup>a</sup>    | 14   | 1,00%   | 25   | 1,50%   | 1,6 | 0,201   | 25   | 1,50%   | 4   | 1,00%   | 0,43 | 0,513              |
| Triticum aestivum |          |     |         |      |         |     |                       |      |         |      |         |     |         |      |         |     |         |      |                    |
| nTri a aA_TI      | Total    | 134 | 100,00% | 1322 | 100,00% |     |                       | 1322 | 100,00% | 1363 | 100,00% |     |         | 1363 | 100,00% | 324 | 100,00% |      |                    |
|                   | Positive | 29  | 21,60%  | 61   | 4,60%   | 61  | <0,001*               | 61   | 4,60%   | 45   | 3,30%   | 3,1 | 0,081   | 45   | 3,30%   | 5   | 1,50%   | 2,81 | 0,093              |
| rTri a 14         | Total    | 134 | 100,00% | 1322 | 100,00% |     |                       | 1322 | 100,00% | 1363 | 100,00% |     |         | 1363 | 100,00% | 324 | 100,00% |      |                    |
|                   | Positive | 8   | 6,00%   | 45   | 3,40%   | 2,3 | 0,131 <sup>a</sup>    | 45   | 3,40%   | 36   | 2,60%   | 1,3 | 0,248   | 36   | 2,60%   | 5   | 1,50%   | 1,33 | 0,249              |
| rTri a 19         | Total    | 134 | 100,00% | 1322 | 100,00% |     |                       | 1322 | 100,00% | 1363 | 100,00% |     |         | 1363 | 100,00% | 324 | 100,00% |      |                    |
|                   | Positive | 24  | 17,90%  | 33   | 2,50%   | 77  | <0,001*               | 33   | 2,50%   | 15   | 1,10%   | 7,5 | 0,006*  | 15   | 1,10%   | 2   | 0,60%   | 0,61 | 0,434 <sup>a</sup> |
| Fish              |          |     |         |      |         |     |                       |      |         |      |         |     |         |      |         |     |         |      |                    |
| rClu h 1          | Total    | 134 | 100,00% | 1322 | 100,00% |     |                       | 1322 | 100,00% | 1363 | 100,00% |     |         | 1363 | 100,00% | 324 | 100,00% |      |                    |
|                   | Positive | 4   | 3,00%   | 55   | 4,20%   | 0,4 | 0,511 <sup>b</sup>    | 55   | 4,20%   | 70   | 5,10%   | 1,4 | 0,23    | 70   | 5,10%   | 7   | 2,20%   | 5,32 | 0,021*             |
| rCyp c 1          | Total    | 135 | 100,00% | 1469 | 100,00% |     |                       | 1469 | 100,00% | 1721 | 100,00% |     |         | 1721 | 100,00% | 390 | 100,00% |      |                    |
|                   | Positive | 5   | 3,70%   | 55   | 3,70%   | 0   | 0,981                 | 55   | 3,70%   | 100  | 5,80%   | 7,3 | 0,007*  | 100  | 5,80%   | 9   | 2,30%   | 7,97 | 0,005*             |
| nGad m 1          | Total    | 135 | 100,00% | 1469 | 100,00% |     |                       | 1469 | 100,00% | 1721 | 100,00% |     |         | 1721 | 100,00% | 390 | 100,00% |      |                    |
|                   | Positive | 2   | 1,50%   | 51   | 3,50%   | 1,5 | 0,216 <sup>a</sup>    | 51   | 3,50%   | 85   | 4,90%   | 4,2 | 0,041*  | 85   | 4,90%   | 12  | 3,10%   | 2,51 | 0,113              |
| nGad m 2&3        | Total    | 134 | 100,00% | 1322 | 100,00% |     |                       | 1469 | 100,00% | 1721 | 100,00% |     |         | 1721 | 100,00% | 390 | 100,00% |      |                    |
|                   | Positive | 0   | 0,00%   | 11   | 0,80%   | 1,1 | 0,289 <sup>a</sup>    | 11   | 0,80%   | 16   | 1,20%   | 0,8 | 0,375   | 16   | 1,20%   | 2   | 0,60%   | 0,77 | 0,381 <sup>a</sup> |
| rRaj c Parvalbu   | Positive | 0   | 0,00%   | 7    | 0,50%   | 0,7 | 0,202 <sup>a, b</sup> | 7    | 0,50%   | 12   | 0,90%   | 1,2 | 0,278   | 12   | 0,90%   | 1   | 0,30%   | 1,12 | 0,200 <sup>a</sup> |

|               |          |     |         |      |         |     |                      |      |         |      |         |     |         |      |         |     |         |      |                    |
|---------------|----------|-----|---------|------|---------|-----|----------------------|------|---------|------|---------|-----|---------|------|---------|-----|---------|------|--------------------|
| rSal s 1      | Total    | 134 | 100,00% | 1322 | 100,00% | 0,1 | 0,030                | 1322 | 100,00% | 1363 | 100,00% | 0,2 | 0,210   | 1363 | 100,00% | 324 | 100,00% | 0,12 | 0,290              |
|               | Positive | 3   | 2,20%   | 57   | 4,30%   | 1,3 | 0,25                 | 57   | 4,30%   | 70   | 5,10%   | 1   | 0,315   | 70   | 5,10%   | 6   | 1,90%   | 6,56 | 0,010*             |
| rSco s 1      | Total    | 134 | 100,00% | 1322 | 100,00% |     |                      | 1322 | 100,00% | 1363 | 100,00% |     |         | 1363 | 100,00% | 324 | 100,00% |      |                    |
|               | Positive | 4   | 3,00%   | 56   | 4,20%   | 0,5 | 0,488                | 56   | 4,20%   | 80   | 5,90%   | 3,7 | 0,054   | 80   | 5,90%   | 6   | 1,90%   | 8,73 | 0,003*             |
| rThu a 1      | Total    | 134 | 100,00% | 1322 | 100,00% |     |                      | 1322 | 100,00% | 1363 | 100,00% |     |         | 1363 | 100,00% | 324 | 100,00% |      |                    |
|               | Positive | 3   | 2,20%   | 54   | 4,10%   | 1,1 | 0,294                | 54   | 4,10%   | 70   | 5,10%   | 1,7 | 0,195   | 70   | 5,10%   | 7   | 2,20%   | 5,32 | 0,021*             |
| rXip g 1      | Total    | 134 | 100,00% | 1322 | 100,00% |     |                      | 1322 | 100,00% | 1363 | 100,00% |     |         | 1363 | 100,00% | 324 | 100,00% |      |                    |
|               | Positive | 4   | 3,00%   | 44   | 3,30%   | 0   | 0,832 <sup>a</sup>   | 44   | 3,30%   | 63   | 4,60%   | 2,9 | 0,087   | 63   | 4,60%   | 7   | 2,20%   | 3,99 | 0,046*             |
| Crustaceans   |          |     |         |      |         |     |                      |      |         |      |         |     |         |      |         |     |         |      |                    |
| nPen m 1      | Total    | 135 | 100,00% | 1469 | 100,00% | 0,1 | 0,739 <sup>a</sup>   | 1469 | 100,00% | 1721 | 100,00% | 6,2 | 0,013*  | 1721 | 100,00% | 390 | 100,00% | 0,08 | 0,779              |
|               | Positive | 2   | 1,50%   | 17   | 1,20%   |     |                      | 17   | 1,20%   | 40   | 2,30%   |     |         | 40   | 2,30%   | 10  | 2,60%   |      |                    |
| rPen m 2      | Total    | 134 | 100,00% | 1322 | 100,00% | 0,5 | 0,476 <sup>a,b</sup> | 1322 | 100,00% | 1363 | 100,00% | 19  | <0,001* | 1363 | 100,00% | 324 | 100,00% | 1,89 | 0,169              |
|               | Positive | 0   | 0,00%   | 5    | 0,40%   |     |                      | 5    | 0,40%   | 32   | 2,30%   |     |         | 32   | 2,30%   | 12  | 3,70%   |      |                    |
| rPen m 3      | Total    | 134 | 100,00% | 1322 | 100,00% | 0,1 | 0,746 <sup>a,b</sup> | 1322 | 100,00% | 1363 | 100,00% | 0,4 | 0,505   | 1363 | 100,00% | 324 | 100,00% | 0,8  | 0,372 <sup>a</sup> |
|               | Positive | 1   | 0,70%   | 7    | 0,50%   |     |                      | 7    | 0,50%   | 10   | 0,70%   |     |         | 10   | 0,70%   | 4   | 1,20%   |      |                    |
| rPen m 4      | Total    | 134 | 100,00% | 1322 | 100,00% | 0   | 0,843 <sup>a,b</sup> | 1322 | 100,00% | 1363 | 100,00% | 0,2 | 0,683   | 1363 | 100,00% | 324 | 100,00% | 0,13 | 0,722 <sup>a</sup> |
|               | Positive | 1   | 0,70%   | 8    | 0,60%   |     |                      | 8    | 0,60%   | 10   | 0,70%   |     |         | 10   | 0,70%   | 3   | 0,90%   |      |                    |
| rCra c 6      | Total    | 134 | 100,00% | 1322 | 100,00% | 0,1 | 0,750 <sup>a,b</sup> | 1322 | 100,00% | 1363 | 100,00% | 9   | 0,003*  | 1363 | 100,00% | 324 | 100,00% | 1,15 | 0,283 <sup>a</sup> |
|               | Positive | 0   | 0,00%   | 1    | 0,10%   |     |                      | 1    | 0,10%   | 12   | 0,90%   |     |         | 12   | 0,90%   | 5   | 1,50%   |      |                    |
| Nuts          |          |     |         |      |         |     |                      |      |         |      |         |     |         |      |         |     |         |      |                    |
| rCor a 1.0401 | Total    | 135 | 100,00% | 1469 | 100,00% | 18  | <0,001*              | 1469 | 100,00% | 1721 | 100,00% | 178 | <0,001* | 1721 | 100,00% | 390 | 100,00% | 9,97 | 0,002*             |
|               | Positive | 0   | 0,00%   | 177  | 12,00%  |     |                      | 177  | 12,00%  | 549  | 31,90%  |     |         | 549  | 31,90%  | 157 | 40,30%  |      |                    |
| rCor a 8      | Total    | 135 | 100,00% | 1469 | 100,00% | 2,5 | 0,115 <sup>a</sup>   | 1469 | 100,00% | 1721 | 100,00% | 1   | 0,321   | 1721 | 100,00% | 390 | 100,00% | 3,79 | 0,052              |
|               | Positive | 1   | 0,70%   | 46   | 3,10%   |     |                      | 46   | 3,10%   | 65   | 3,80%   |     |         | 65   | 3,80%   | 7   | 1,80%   |      |                    |
| nCor a 9      | Total    | 135 | 100,00% | 1469 | 100,00% | 13  | <0,001*              | 1469 | 100,00% | 1721 | 100,00% | 43  | <0,001* | 1721 | 100,00% | 390 | 100,00% | 14,3 | <0,001*            |
|               | Positive | 41  | 30,40%  | 261  | 17,80%  |     |                      | 261  | 17,80%  | 169  | 9,80%   |     |         | 169  | 9,80%   | 15  | 3,80%   |      |                    |
| nCor a 11     | Total    | 16  | 100,00% | 168  | 100,00% | 5,2 | 0,022 <sup>a,*</sup> | 168  | 100,00% | 165  | 100,00% | 0,6 | 0,443   | 165  | 100,00% | 44  | 100,00% | 11   | 0,001*             |
|               | Positive | 9   | 56,30%  | 48   | 28,60%  |     |                      | 48   | 28,60%  | 41   | 24,80%  |     |         | 41   | 24,80%  | 1   | 2,30%   |      |                    |
| nCor a 14     | Total    | 135 | 100,00% | 1469 | 100,00% | 4,3 | 0,038*               | 1469 | 100,00% | 1721 | 100,00% | 8,4 | 0,004*  | 1721 | 100,00% | 390 | 100,00% | 10,1 | 0,001*             |
|               | Positive | 7   | 5,20%   | 160  | 10,90%  |     |                      | 160  | 10,90%  | 136  | 7,90%   |     |         | 136  | 7,90%   | 13  | 3,30%   |      |                    |
| nJug r 1      | Total    | 135 | 100,00% | 1469 | 100,00% | 5,1 | 0,023*               | 1469 | 100,00% | 1721 | 100,00% | 4,9 | 0,027*  | 1721 | 100,00% | 390 | 100,00% | 7,68 | 0,006*             |
|               | Positive | 7   | 5,20%   | 170  | 11,60%  |     |                      | 170  | 11,60%  | 158  | 9,20%   |     |         | 158  | 9,20%   | 19  | 4,90%   |      |                    |

|          |          |     |         |      |         |     |                    |      |         |      |         |     |         |      |         |     |         |      |        |
|----------|----------|-----|---------|------|---------|-----|--------------------|------|---------|------|---------|-----|---------|------|---------|-----|---------|------|--------|
| nJug r 2 | Positive | 6   | 4,40%   | 171  | 11,60%  | 6,5 | 0,011*             | 171  | 11,60%  | 195  | 11,30%  | 0,1 | 0,784   | 195  | 11,30%  | 29  | 7,40%   | 5,08 | 0,024* |
|          | Total    | 135 | 100,00% | 1469 | 100,00% |     |                    | 1469 | 100,00% | 1721 | 100,00% |     |         | 1721 | 100,00% | 390 | 100,00% |      |        |
| rJug r 3 | Positive | 1   | 0,70%   | 24   | 1,80%   | 0,8 | 0,364 <sup>a</sup> | 24   | 1,80%   | 39   | 2,90%   | 3,2 | 0,073   | 39   | 2,90%   | 6   | 1,90%   | 1,03 | 0,311  |
|          | Total    | 134 | 100,00% | 1322 | 100,00% |     |                    | 1322 | 100,00% | 1363 | 100,00% |     |         | 1363 | 100,00% | 324 | 100,00% |      |        |
| nJug r 4 | Positive | 35  | 26,10%  | 239  | 18,10%  | 5,2 | 0,023*             | 239  | 18,10%  | 141  | 10,30%  | 33  | <0,001* | 141  | 10,30%  | 16  | 4,90%   | 9,07 | 0,003* |
|          | Total    | 134 | 100,00% | 1322 | 100,00% |     |                    | 1322 | 100,00% | 1363 | 100,00% |     |         | 1363 | 100,00% | 324 | 100,00% |      |        |
| nJug r 6 | Positive | 5   | 3,70%   | 100  | 7,60%   | 2,7 | 0,102              | 100  | 7,60%   | 110  | 8,10%   | 0,2 | 0,625   | 110  | 8,10%   | 14  | 4,30%   | 5,4  | 0,020* |
|          | Total    | 134 | 100,00% | 1322 | 100,00% |     |                    | 1322 | 100,00% | 1363 | 100,00% |     |         | 1363 | 100,00% | 324 | 100,00% |      |        |

\*. The chi-square statistic is significant at the 0.05 level.

a. More than 20% of the cells in this sub-table have an expected sample size lower than 5. The results of the chi-square test may not be correct.

b. The minimum expected sample size in cells for this sub-table is less than one. The results of the chi-square test may not be correct.
