# Supplementary material for: The Sensitization Profile for Selected Food Allergens in Polish Children Assessed with the Use of a Precision Allergy Molecular Diagnostic Technique
Source: MDPI journal article supplement (doi:10.3390/ijms25020825), 2024-01-09
Supplement: s1 [file s1]

Table A1: The entire ranking of sIgE rates in response to all analyzed food allergen extracts

| Place in the ranking of sIgE frequency of investigated 96 food allergen extracts | Tested allergen           | Allergen source                             | Number of all sIgE determinations performed | Number and % of „+” sIgE from all sIgE determinations performed |        | Place in the ranking of sIgE frequency of investigated 96 food allergen extracts | Mean concentration [kU/∕l] |
|----------------------------------------------------------------------------------|---------------------------|---------------------------------------------|---------------------------------------------|-----------------------------------------------------------------|--------|----------------------------------------------------------------------------------|----------------------------|
| 1                                                                                | Ara h                     | Peanut ( <i>Arachis hypogaea</i> )          | 500                                         | 146                                                             | 29,20% | 3                                                                                | 8,54                       |
| 2                                                                                | Cor a hazel               | Hazel ( <i>Corylus avellana</i> )           | 500                                         | 141                                                             | 28,20% | 24                                                                               | 4,25                       |
| 3                                                                                | Mal d                     | Apple ( <i>Malus domestica</i> )            | 500                                         | 118                                                             | 23,60% | 14                                                                               | 5,69                       |
| 4                                                                                | Gal d białko jaja kurzego | Egg white ( <i>Gallus domesticus</i> )      | 3715                                        | 653                                                             | 17,58% | 18                                                                               | 5,46                       |
| 5                                                                                | Ana o                     | Cashew ( <i>Anacardium occidentale</i> )    | 3715                                        | 570                                                             | 15,34% | 5                                                                                | 7,44                       |
| 6                                                                                | Pis v                     | Pistachio ( <i>Pistacia vera</i> )          | 500                                         | 76                                                              | 15,20% | 10                                                                               | 6,37                       |
| 7                                                                                | Gly m                     | Soy ( <i>Glycine max</i> )                  | 500                                         | 73                                                              | 14,60% | 33                                                                               | 3,76                       |
| 8                                                                                | Api g                     | Celery ( <i>Apium graveolens</i> )          | 500                                         | 72                                                              | 14,40% | 36                                                                               | 3,40                       |
| 9                                                                                | Jug r nut                 | Walnut ( <i>Juglans regia</i> )             | 500                                         | 70                                                              | 14,00% | 13                                                                               | 5,78                       |
| 10                                                                               | Cic a                     | Chickpea ( <i>Cicer arietinus</i> )         | 3715                                        | 503                                                             | 13,54% | 23                                                                               | 4,37                       |
| 11                                                                               | Car i                     | Pecan ( <i>Carya illinoensis</i> )          | 3715                                        | 478                                                             | 12,87% | 8                                                                                | 6,64                       |
| 12                                                                               | Dau c                     | Carrot ( <i>Daucus carota</i> )             | 3715                                        | 476                                                             | 12,81% | 9                                                                                | 6,49                       |
| 13                                                                               | Ses i                     | Sesame ( <i>Sesamum indicum</i> )           | 3715                                        | 439                                                             | 11,82% | 15                                                                               | 5,68                       |
| 14                                                                               | Pru du                    | Almond ( <i>Prunus dulcis</i> )             | 3715                                        | 420                                                             | 11,31% | 29                                                                               | 4,05                       |
| 15                                                                               | Hel a                     | Sunflower seed ( <i>Helianthus annuus</i> ) | 3715                                        | 404                                                             | 10,87% | 48                                                                               | 2,68                       |
| 16                                                                               | Pap s                     | Poppy seed ( <i>Papaver somniferum</i> )    | 3715                                        | 392                                                             | 10,55% | 34                                                                               | 3,70                       |
| 17                                                                               | Bos d                     | Cattle ( <i>Bos domesticus</i> )            | 3715                                        | 383                                                             | 10,31% | 1                                                                                | 9,86                       |
| 18                                                                               | Act d                     | Kiwi ( <i>Actinidia deliciosa</i> )         | 621                                         | 63                                                              | 10,14% | 46                                                                               | 2,74                       |
| 19                                                                               | Ber e                     | Brazil nut ( <i>Bertholletia excelsa</i> )  | 3715                                        | 364                                                             | 9,80%  | 28                                                                               | 4,06                       |
| 20                                                                               | Fag e                     | Buckwheat ( <i>Fagopyrum esculentum</i> )   | 3715                                        | 358                                                             | 9,64%  | 39                                                                               | 3,28                       |
| 21                                                                               | Cuc p                     | Pumpkin seed ( <i>Cucurbita pepo</i> )      | 3715                                        | 344                                                             | 9,26%  | 20                                                                               | 5,17                       |
| 22                                                                               | Ovi a milk                | Sheep's milk ( <i>Ovis aries</i> )          | 3715                                        | 320                                                             | 8,61%  | 12                                                                               | 5,94                       |
| 23                                                                               | Ave s                     | Oat ( <i>Avena sativa</i> )                 | 3715                                        | 318                                                             | 8,56%  | 44                                                                               | 2,95                       |
| 24                                                                               | Sol t                     | Potato ( <i>Solanum tuberosum</i> )         | 3715                                        | 312                                                             | 8,40%  | 41                                                                               | 3,16                       |
| 25                                                                               | Pis s                     | Pea ( <i>Pisum sativum</i> )                | 3715                                        | 298                                                             | 8,02%  | 31                                                                               | 3,88                       |
| 26                                                                               | Pru p                     | Peach ( <i>Prunus persica</i> )             | 500                                         | 40                                                              | 8,00%  | 37                                                                               | 3,37                       |
| 27                                                                               | Len c                     | Lentil ( <i>Lens culinaris</i> )            | 3715                                        | 295                                                             | 7,94%  | 43                                                                               | 2,98                       |
| 28                                                                               | Cap h milk                | Goat's milk ( <i>Capra hircus</i> )         | 3715                                        | 289                                                             | 7,78%  | 19                                                                               | 5,24                       |
| 29                                                                               | Lup a                     | Lupine seed ( <i>Lupinus albus</i> )        | 3715                                        | 275                                                             | 7,40%  | 27                                                                               | 4,14                       |
| 30                                                                               | All s                     | Garlic ( <i>Allium sativum</i> )            | 3715                                        | 264                                                             | 7,11%  | 55                                                                               | 1,88                       |
| 31                                                                               | Pyr c                     | Pear ( <i>Pyrus communis</i> )              | 3715                                        | 251                                                             | 6,76%  | 52                                                                               | 2,10                       |

|    |                           |                                                       |      |     |       |    |      |
|----|---------------------------|-------------------------------------------------------|------|-----|-------|----|------|
| 32 | Mac inte                  | Macadamia ( <i>Macadamia integrifolia</i> )           | 3715 | 243 | 6,54% | 17 | 5,47 |
| 33 | Tri fo                    | Fenugreek seed ( <i>Trigonella foenum-graecum</i> )   | 3143 | 188 | 5,98% | 21 | 4,69 |
| 34 | Che q                     | Quinoa ( <i>Chenopodium quinoa</i> )                  | 3715 | 215 | 5,79% | 64 | 1,59 |
| 35 | Gal d żółtko jaja kurzego | Egg yolk ( <i>Gallus domesticus</i> )                 | 3715 | 212 | 5,71% | 40 | 3,26 |
| 36 | Sec c flour               | Rye ( <i>Secale cereale</i> )                         | 3715 | 197 | 5,30% | 36 | 3,40 |
| 36 | Sin                       | Mustard ( <i>Brassica / Sinapis spp.</i> )            | 3715 | 197 | 5,30% | 42 | 3,03 |
| 37 | Equ c meat                | Horse ( <i>Equus caballus</i> )                       | 1913 | 99  | 5,18% | 76 | 1,17 |
| 38 | Hor v                     | Barley ( <i>Hordeum vulgare</i> )                     | 3715 | 186 | 5,01% | 53 | 2,04 |
| 39 | Tri a                     | Wheat ( <i>Triticum aestivum</i> )                    | 500  | 23  | 4,60% | 25 | 4,24 |
| 40 | Tri s                     | Spelt ( <i>Triticum spelta</i> )                      | 3715 | 167 | 4,50% | 38 | 3,32 |
| 41 | Gad m                     | Atlantic cod ( <i>Gadus morhua</i> )                  | 3715 | 157 | 4,23% | 6  | 7,08 |
| 42 | Bra o                     | Cabbage ( <i>Brassica oleracea</i> )                  | 500  | 21  | 4,20% | 54 | 2,01 |
| 43 | Ost e                     | Oyster ( <i>Ostrea edulis</i> )                       | 3715 | 153 | 4,12% | 50 | 2,35 |
| 44 | Pha v                     | White beans ( <i>Phaseolus vulgaris</i> )             | 3715 | 141 | 3,80% | 81 | 1,01 |
| 45 | Aga b                     | White mushroom ( <i>Agaricus hortensis/bisporus</i> ) | 500  | 18  | 3,60% | 56 | 0,45 |
| 46 | Sola l                    | Tomato ( <i>Solanum lycopersicum</i> )                | 3715 | 133 | 3,58% | 90 | 1,87 |
| 47 | Pers a                    | Avocado ( <i>Persea americana</i> )                   | 3715 | 127 | 3,42% | 62 | 1,63 |
| 48 | Ole fruit                 | Olive ( <i>Olea Europaea</i> )                        | 500  | 17  | 3,40% | 60 | 1,70 |
| 48 | Pru do                    | Plum ( <i>Prunus domestica</i> )                      | 500  | 17  | 3,40% | 71 | 1,28 |
| 49 | Rub i                     | Raspberry ( <i>Rubus idaeus</i> )                     | 500  | 16  | 3,20% | 51 | 2,24 |
| 50 | Cam d                     | Camel's milk ( <i>Camelus dromedarius</i> )           | 3715 | 111 | 2,99% | 32 | 3,78 |
| 51 | Cuc m                     | Muskmelon ( <i>Cucumis melo</i> )                     | 500  | 14  | 2,80% | 74 | 1,35 |
| 52 | Pim a                     | Anise ( <i>Pimpinella anisum</i> )                    | 3715 | 103 | 2,77% | 70 | 1,22 |
| 53 | Pan m                     | Millet ( <i>Panicum miliaceum</i> )                   | 3715 | 102 | 2,75% | 61 | 1,64 |
| 54 | Cap a                     | Paprika ( <i>Capsicum annuum</i> )                    | 3715 | 101 | 2,72% | 58 | 1,84 |
| 55 | Clu h                     | Atlantic herring ( <i>Clupea harengus</i> )           | 3143 | 84  | 2,67% | 22 | 4,42 |
| 56 | Bos d nabłonek            | Cattle's epithelia ( <i>Bos domesticus</i> )          | 500  | 13  | 2,60% | 63 | 1,60 |
| 57 | Ovi a meat                | Lamb ( <i>Ovis aries</i> )                            | 3715 | 94  | 2,53% | 30 | 4,03 |
| 58 | Lol spp.                  | Squid ( <i>Loligo spp.</i> )                          | 3715 | 86  | 2,31% | 26 | 4,19 |
| 59 | Myt e                     | Common mussel ( <i>Mytilus edulis</i> )               | 3715 | 83  | 2,23% | 45 | 2,77 |
| 60 | Car p                     | Papaya ( <i>Carica papaya</i> )                       | 3715 | 82  | 2,21% | 49 | 2,43 |
| 60 | Hom g                     | Lobster ( <i>Homarus gammarus</i> )                   | 3715 | 82  | 2,21% | 16 | 5,65 |
| 61 | Car c                     | Caraway ( <i>Carum carvi</i> )                        | 3715 | 78  | 2,10% | 68 | 1,41 |
| 62 | Sal s                     | Salmon ( <i>Salmo salar</i> )                         | 3715 | 74  | 1,99% | 35 | 3,63 |
| 63 | Fic c                     | Fig ( <i>Ficus carica</i> )                           | 3715 | 69  | 1,86% | 66 | 1,46 |
| 63 | Zea m                     | Corn, cereal ( <i>Zea mays</i> )                      | 3715 | 69  | 1,86% | 65 | 1,47 |
| 64 | Ory s                     | Rice ( <i>Oryza sativa</i> )                          | 3715 | 62  | 1,67% | 75 | 1,18 |
| 64 | Vac m                     | Blueberry ( <i>Vaccinium myrtillus</i> )              | 3715 | 62  | 1,67% | 88 | 0,75 |
| 65 | Ory meat                  | Rabbit ( <i>Oryctolagus spp.</i> )                    | 3715 | 60  | 1,62% | 59 | 1,83 |
| 66 | Equ c milk                | Mare's milk ( <i>Equus caballus</i> )                 | 3715 | 58  | 1,56% | 45 | 2,77 |
| 67 | Pru av                    | Cherry ( <i>Prunus spp.</i> )                         | 3715 | 57  | 1,53% | 68 | 1,41 |

|    |             |                                                         |      |    |       |    |      |
|----|-------------|---------------------------------------------------------|------|----|-------|----|------|
| 68 | All c       | Onion ( <i>Allium cepa</i> )                            | 3715 | 56 | 1,51% | 77 | 1,15 |
| 69 | Chi spp.    | Crab ( <i>Chionoecetes spp.</i> )                       | 3715 | 52 | 1,40% | 4  | 8,38 |
| 70 | Bro pa      | Paper mulberry ( <i>Broussonetia papyrifera</i> )       | 3143 | 43 | 1,37% | 87 | 0,76 |
| 71 | Pan b       | Northern prawn ( <i>Pandalus borealis</i> )             | 3715 | 50 | 1,35% | 2  | 6,17 |
| 72 | Gal d mięso | Chicken ( <i>Gallus domesticus</i> )                    | 3715 | 46 | 1,24% | 67 | 1,45 |
| 72 | Lit s       | <i>aeus setiferus, Farfantepenaeus aztecus, Farfant</i> | 3715 | 46 | 1,24% | 11 | 8,55 |
| 72 | Mel g       | Turkey ( <i>Meleagris gallopavo</i> )                   | 3715 | 46 | 1,24% | 57 | 1,86 |
| 73 | Mus a       | Banana ( <i>Musa acuminata</i> )                        | 3715 | 37 | 1,00% | 82 | 0,99 |
| 74 | Sus d meat  | Pig ( <i>Sus domesticus</i> )                           | 3715 | 36 | 0,97% | 70 | 1,35 |
| 75 | Thu a       | Tuna ( <i>Thunnus albacares</i> )                       | 3715 | 35 | 0,94% | 78 | 1,11 |
| 76 | Sco s       | Atlantic mackerel ( <i>Scomber scombrus</i> )           | 3143 | 29 | 0,92% | 84 | 0,92 |
| 76 | Che a       | Lamb's quarter ( <i>Chenopodium album</i> )             | 3715 | 34 | 0,92% | 47 | 2,71 |
| 77 | Pet c       | Parsley ( <i>Petroselinum crispum</i> )                 | 3715 | 30 | 0,81% | 72 | 1,27 |
| 77 | Rud spp.    | Venus clam ( <i>Ruditapes spp.</i> )                    | 3715 | 30 | 0,81% | 7  | 6,89 |
| 78 | Lit c       | Lychee ( <i>Litchi chinensis</i> )                      | 500  | 4  | 0,80% | 79 | 0,49 |
| 79 | Cit s       | Orange ( <i>Citrus sinensis</i> )                       | 3715 | 28 | 0,75% | 69 | 1,08 |
| 79 | Pec spp.    | Scallop ( <i>Pecten spp.</i> )                          | 3715 | 28 | 0,75% | 89 | 1,39 |
| 80 | Mor r       | Mulberry tree ( <i>Morus rubra</i> )                    | 3715 | 26 | 0,70% | 85 | 0,89 |
| 81 | Man i       | Mango ( <i>Mangifera indica</i> )                       | 3715 | 23 | 0,62% | 83 | 0,98 |
| 82 | Lac s       | Lettuce ( <i>Lactuca sativa</i> )                       | 500  | 3  | 0,60% | 73 | 1,24 |
| 83 | Fra a       | Strawberry ( <i>Fragaria ananassa</i> )                 | 500  | 2  | 0,40% | 91 | 0,40 |
| 84 | Ori v       | Oregano ( <i>Origanum vulgare</i> )                     | 3715 | 11 | 0,30% | 80 | 1,05 |
| 85 | Raj c       | Thornback ray ( <i>Raja clavata</i> )                   | 3143 | 5  | 0,16% | 86 | 0,78 |
