# Supplementary figures and images for: The Sensitization Profile for Selected Food Allergens in Polish Children Assessed with the Use of a Precision Allergy Molecular Diagnostic Technique
Source: MDPI journal article supplement (doi:10.3390/ijms25020825), 2024-01-09

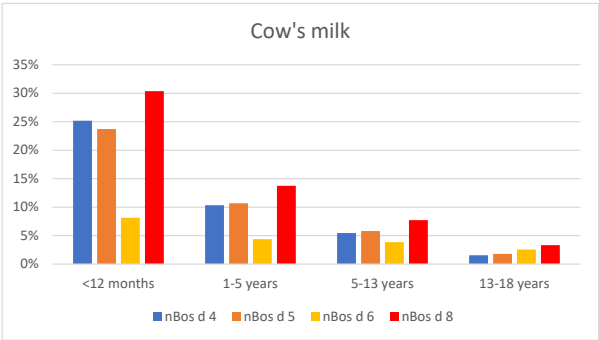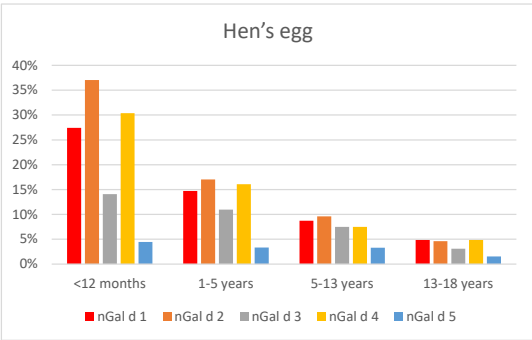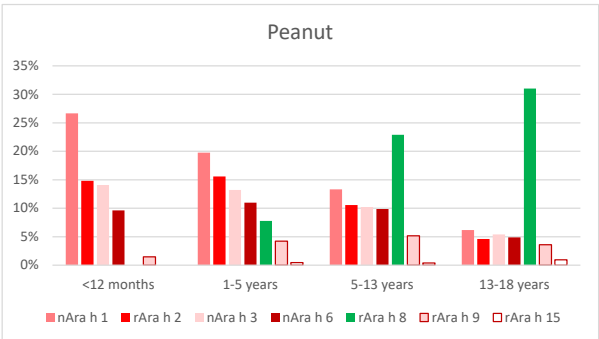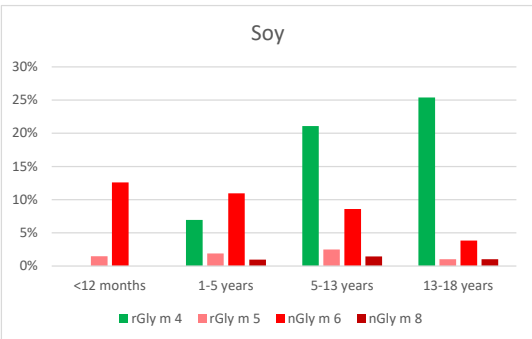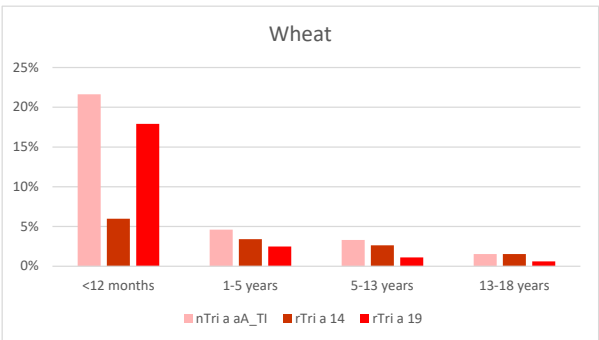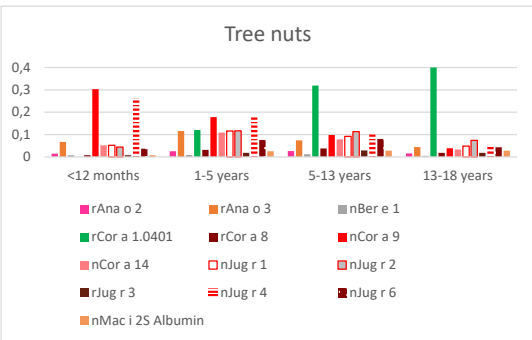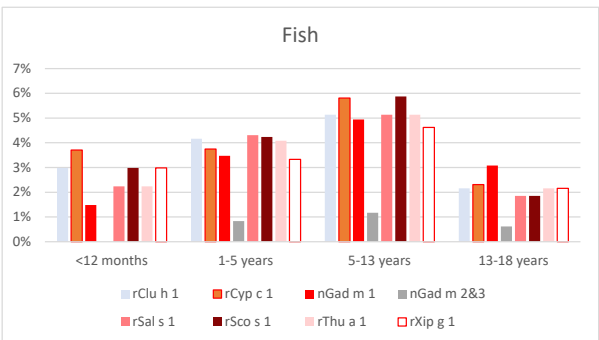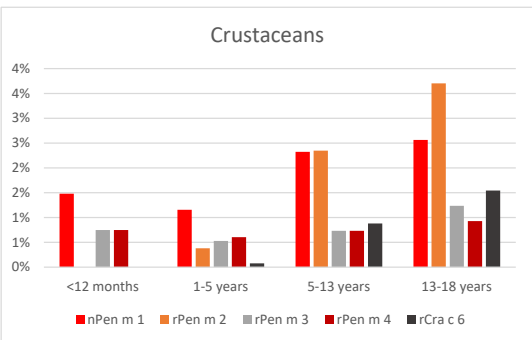

Supplement: s1 [file s1]
